# Supplementary material for: Polyamine Transport Protein PotD Protects Mice against Haemophilus parasuis and Elevates the Secretion of Pro-Inflammatory Cytokines of Macrophage via JNK–MAPK and NF–κB Signal Pathways through TLR4
Source: MDPI journal article supplement (doi:10.3390/vaccines7040216), 2019-12-14
Supplement: s1 [file s1]

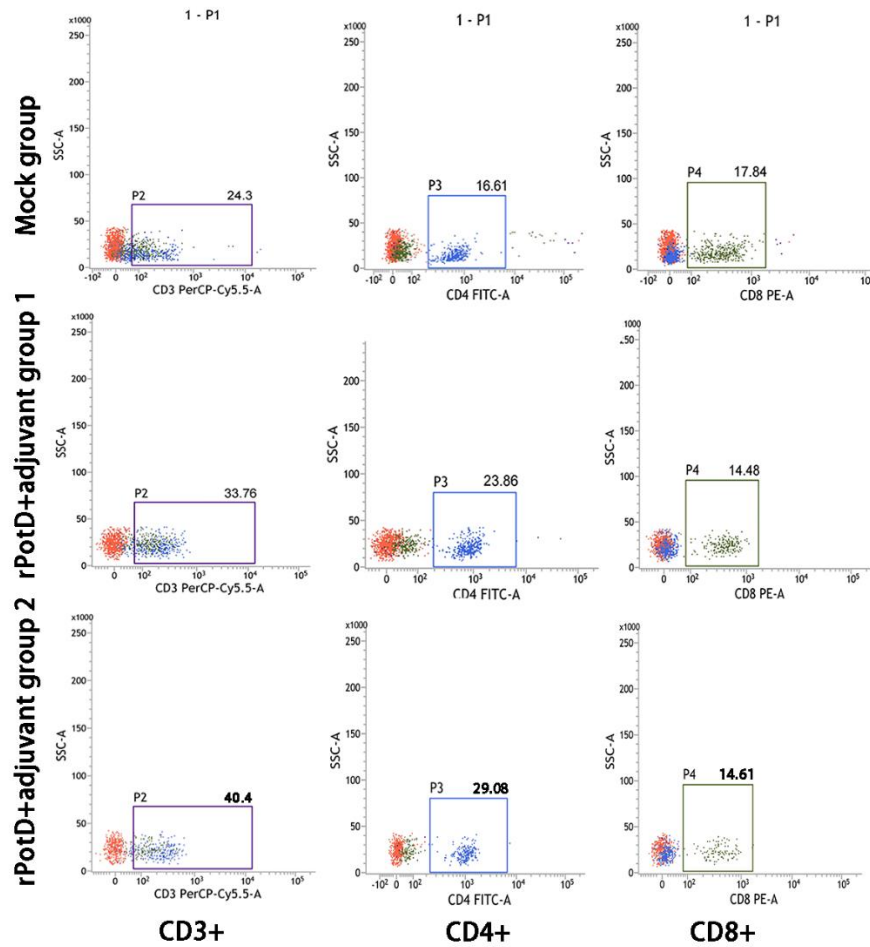

**Figure S1.** Percentages of total T cells (mature T lymphocytes) and the T cell subsets T-helper cells (CD4+) and T suppressors/cytotoxic T-cells (CD8+) in a representative peripheral blood sample by FCM (%). All experiments were performed in triplicate with at least 10,000 cells per treatment. The first lane: CD3+. The second lane: CD4+. The third lane: CD8+. The first row: Mock group. The second row: rPotD+adjuvant group 1. The third row: rPotD+adjuvant group 2.

200×

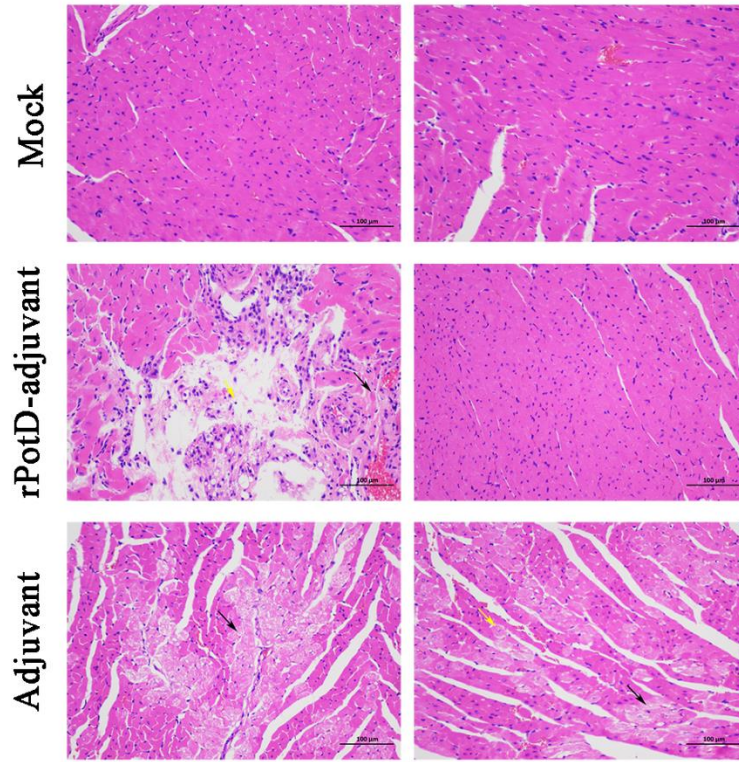

(A)

200×

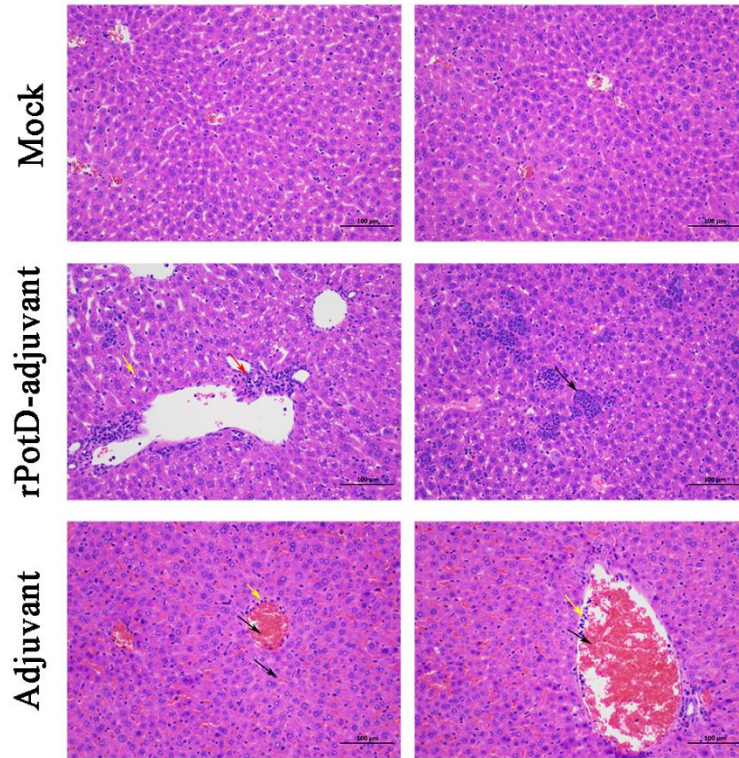

(B)

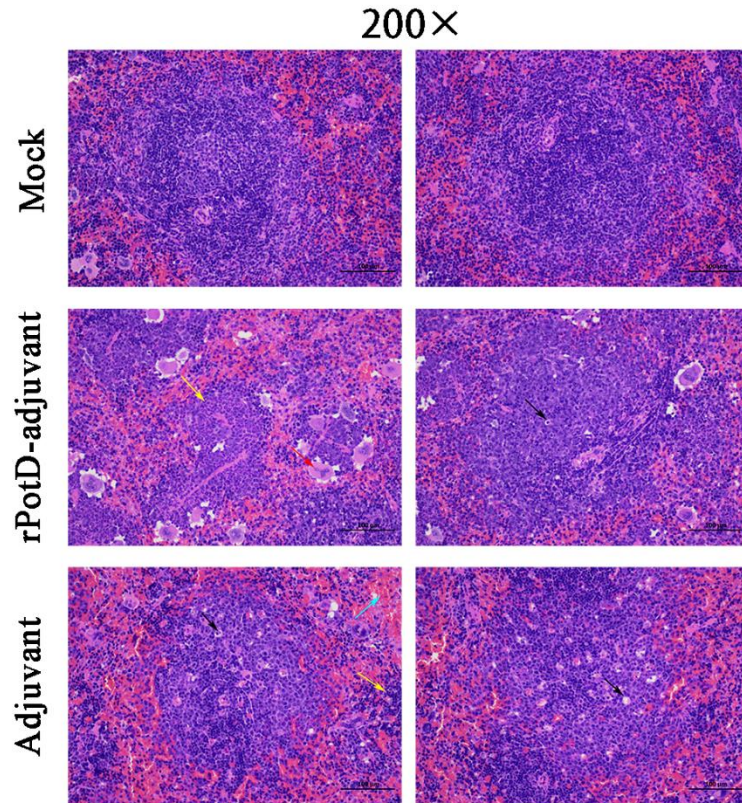

(C)

**Figure S2.** Histopathologic analysis of mice hearts, livers and spleens (200×). Hearts, livers and spleens tissues were harvested from mice in different groups after 72 h dpi, and used for HE staining and histopathological assay. (A) Hearts. (B) Livers. (C) **Spleens.** **Obvious** lesions have been marked with arrows. Main pathological changes in wild-type SC1401 and complemented groups: **(Hearts)** myocardial fiber necrosis, nuclear pyknosis, deep staining or dissolution; neutrophil infiltration. **(Livers)** A large number of congestions and dilations in central veins, portal veins and hepatic sinus; a multitude of red blood cells can be seen in the venous cava and hepatic sinus (black arrow); adhesive white blood cells are widespread in central veins and portal veins (yellow arrow). **(Spleens)** lymphocytic necrosis, hyperchromatism or dissolution in splenic nodule (black arrow); more extramedullary hematopoietic cells appear in the red pulps (yellow arrow), and the splenic sinus is dilated with congestion (blue arrow).

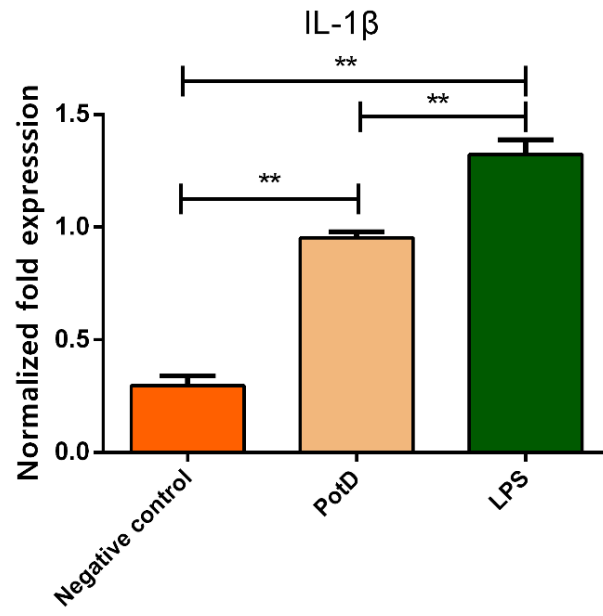

(A)

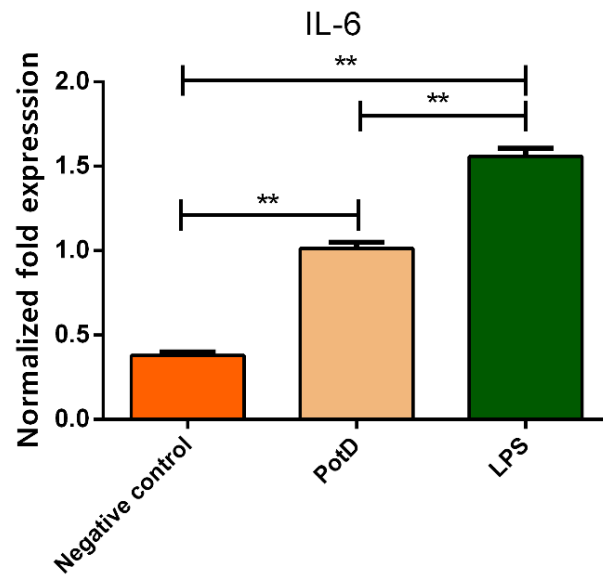

(B)

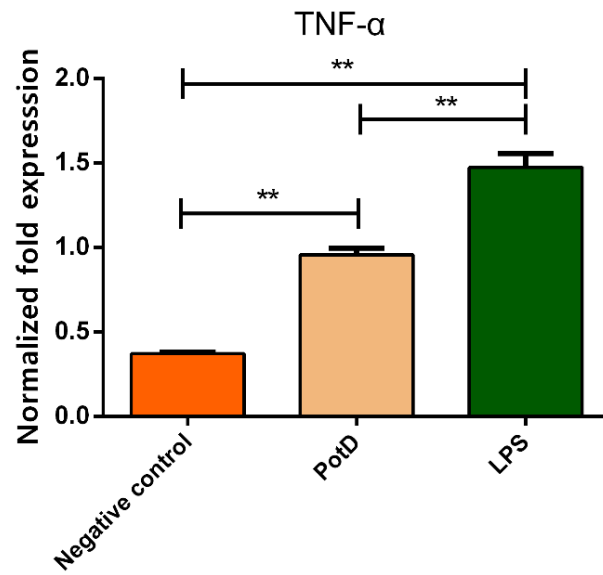

(C)

**Figure S3.** qPCR detection of the levels of pro-inflammatory cytokines induced by rPotD. Induction of cytokines in Raw 264.7 macrophages by rPotD stimulation. Raw 264.7 macrophages were incubated with 15  $\mu\text{g}/\text{mL}$  rPotD and 200  $\text{ng}/\text{mL}$  LPS (positive control) for 12 h, as well as sole culture media (negative control). Quantification analysis was conducted to analyze the transcriptional levels of IL-1 $\beta$  (A), IL-6 (B), TNF- $\alpha$  (C). GAPDH was chosen to be a reference gene in relatively quantification analysis.

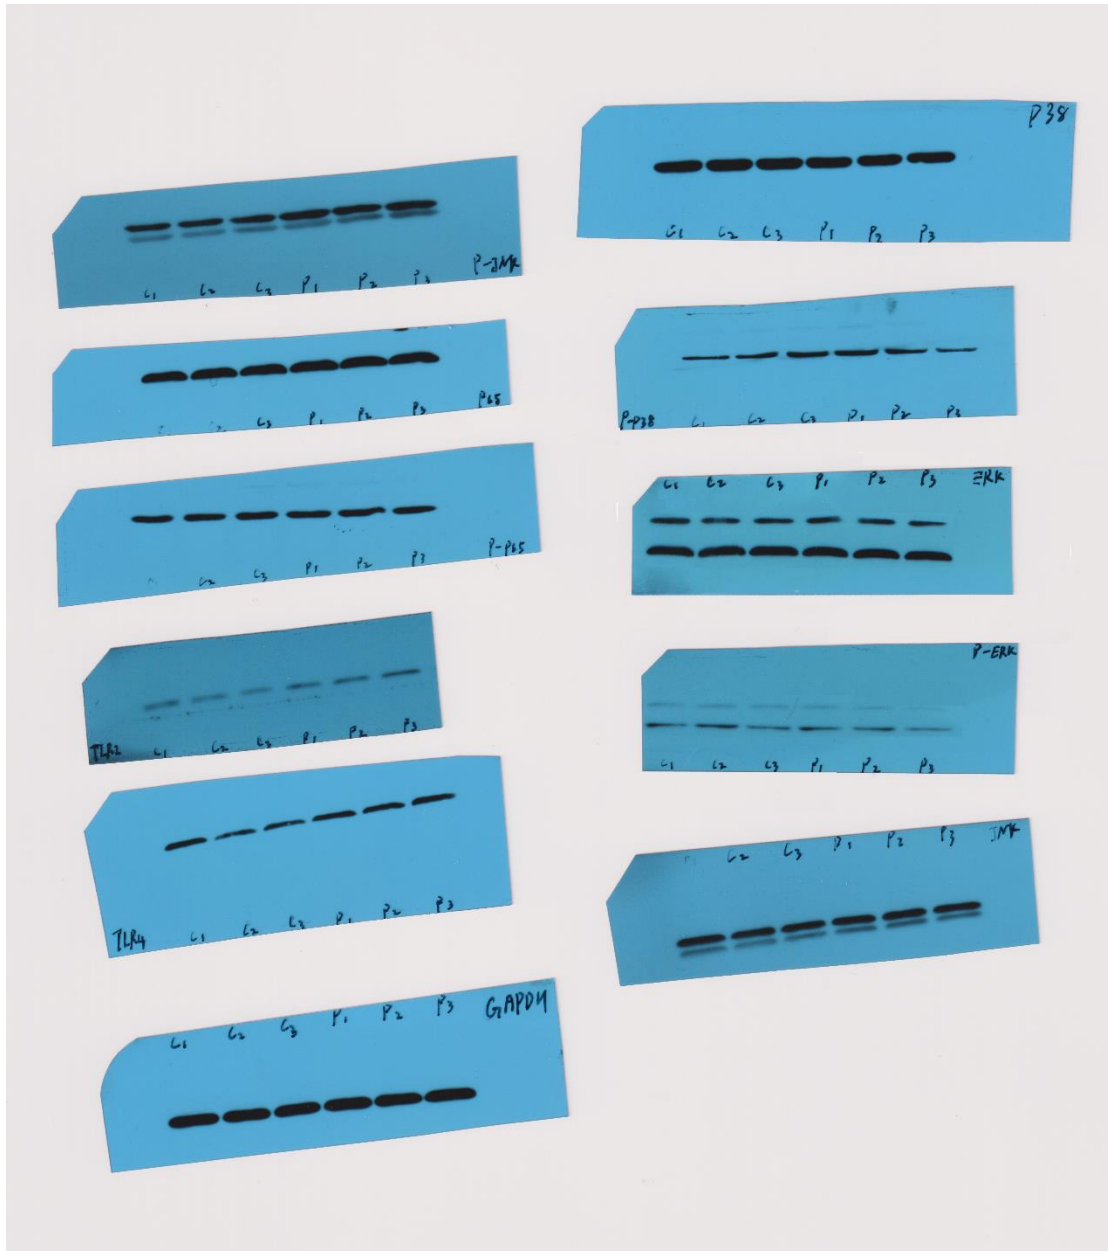

**Figure 4.** The raw data of western blotting used in this study.

**original data:**

**gray value:**

|             | mock      | mock      | mock      | PotD      | PotD      | PotD      |
|-------------|-----------|-----------|-----------|-----------|-----------|-----------|
| P38/GAPDH   | 1.104373  | 1.118056  | 1.091653  | 1.028157  | 0.9923858 | 0.9989956 |
| P-P38/GAPDH | 0.3185404 | 0.4164839 | 0.4640844 | 0.4580914 | 0.3627991 | 0.2496564 |
| ERK/GAPDH   | 0.4282264 | 0.3737208 | 0.380251  | 0.342344  | 0.3676577 | 0.3099383 |
| P-ERK/GAPDH | 0.8035775 | 0.8120614 | 0.8390253 | 0.7870283 | 0.7975345 | 0.7409339 |

JNK/GAPDH 0.1845989 0.2072368 0.1849427 0.1965893 0.1856418 0.1656388  
P-JNK/GAPDH 0.6797245 0.7163743 0.7855974 1.05225 1.070522 1.128634  
P65/GAPDH 0.8121277 0.8245614 0.8444445 0.8996372 0.8962654 0.9016387  
P-P65/GAPDH 0.5076469 0.52505581015 0.5930697 0.6054387 0.5634537  
TLR2/GAPDH 0.1176997 0.1111111 0.1057647 0.1258708 0.1357324 0.141674  
TLR4/GAPDH 0.3553171 0.3108553 0.3312602 0.4571843 0.4650472 0.4757709

**ratio:**

|           |           |           |           |           |           |           |
|-----------|-----------|-----------|-----------|-----------|-----------|-----------|
| P-P38/P38 | 0.2884354 | 0.3725074 | 0.4251208 | 0.4455463 | 0.3655828 | 0.2499074 |
| P-ERK/ERK | 1.876525  | 2.172909  | 2.206504  | 2.29894   | 2.169231  | 2.390585  |
| P-JNK/JNK | 3.682171  | 3.45679   | 4.247787  | 5.352529  | 5.766602  | 6.81383   |
| P-P65/P65 | 0.6250826 | 0.6367021 | 0.6609097 | 0.6592321 | 0.6755127 | 0.6249219 |

**Figure S4. The raw data of western blotting used in this study.**
